# Supplementary material for: Spectral properties of a novel antimony(iii)-phthalocyanine complex that behaves like J-aggregates in non-aqueous mediaElectronic supplementary information (ESI) available: Raman spectra of [Sb(tbpc)]+I3? for tablet. See http://www.rsc.org/suppdata/cc/b3/b304089e/
Source: Royal Society of Chemistry journal article supplement (doi:10.1039/b304089e), 2003-01-01
Supplement: b304089e.doc [file b304089e.doc]

Raman scattering spectrum of [Sb(tbpc)+]I3- for tablet (excitation at 414.54 nm, 100mW).
